# Supplementary material for: Loss of secreted gelsolin enhances response to anticancer therapies
Source: PubMed Central journal article supplement (PMC9516286; doi:10.1136/jitc-2022-005245), 2022-09-26

# Supplementary Figure S1

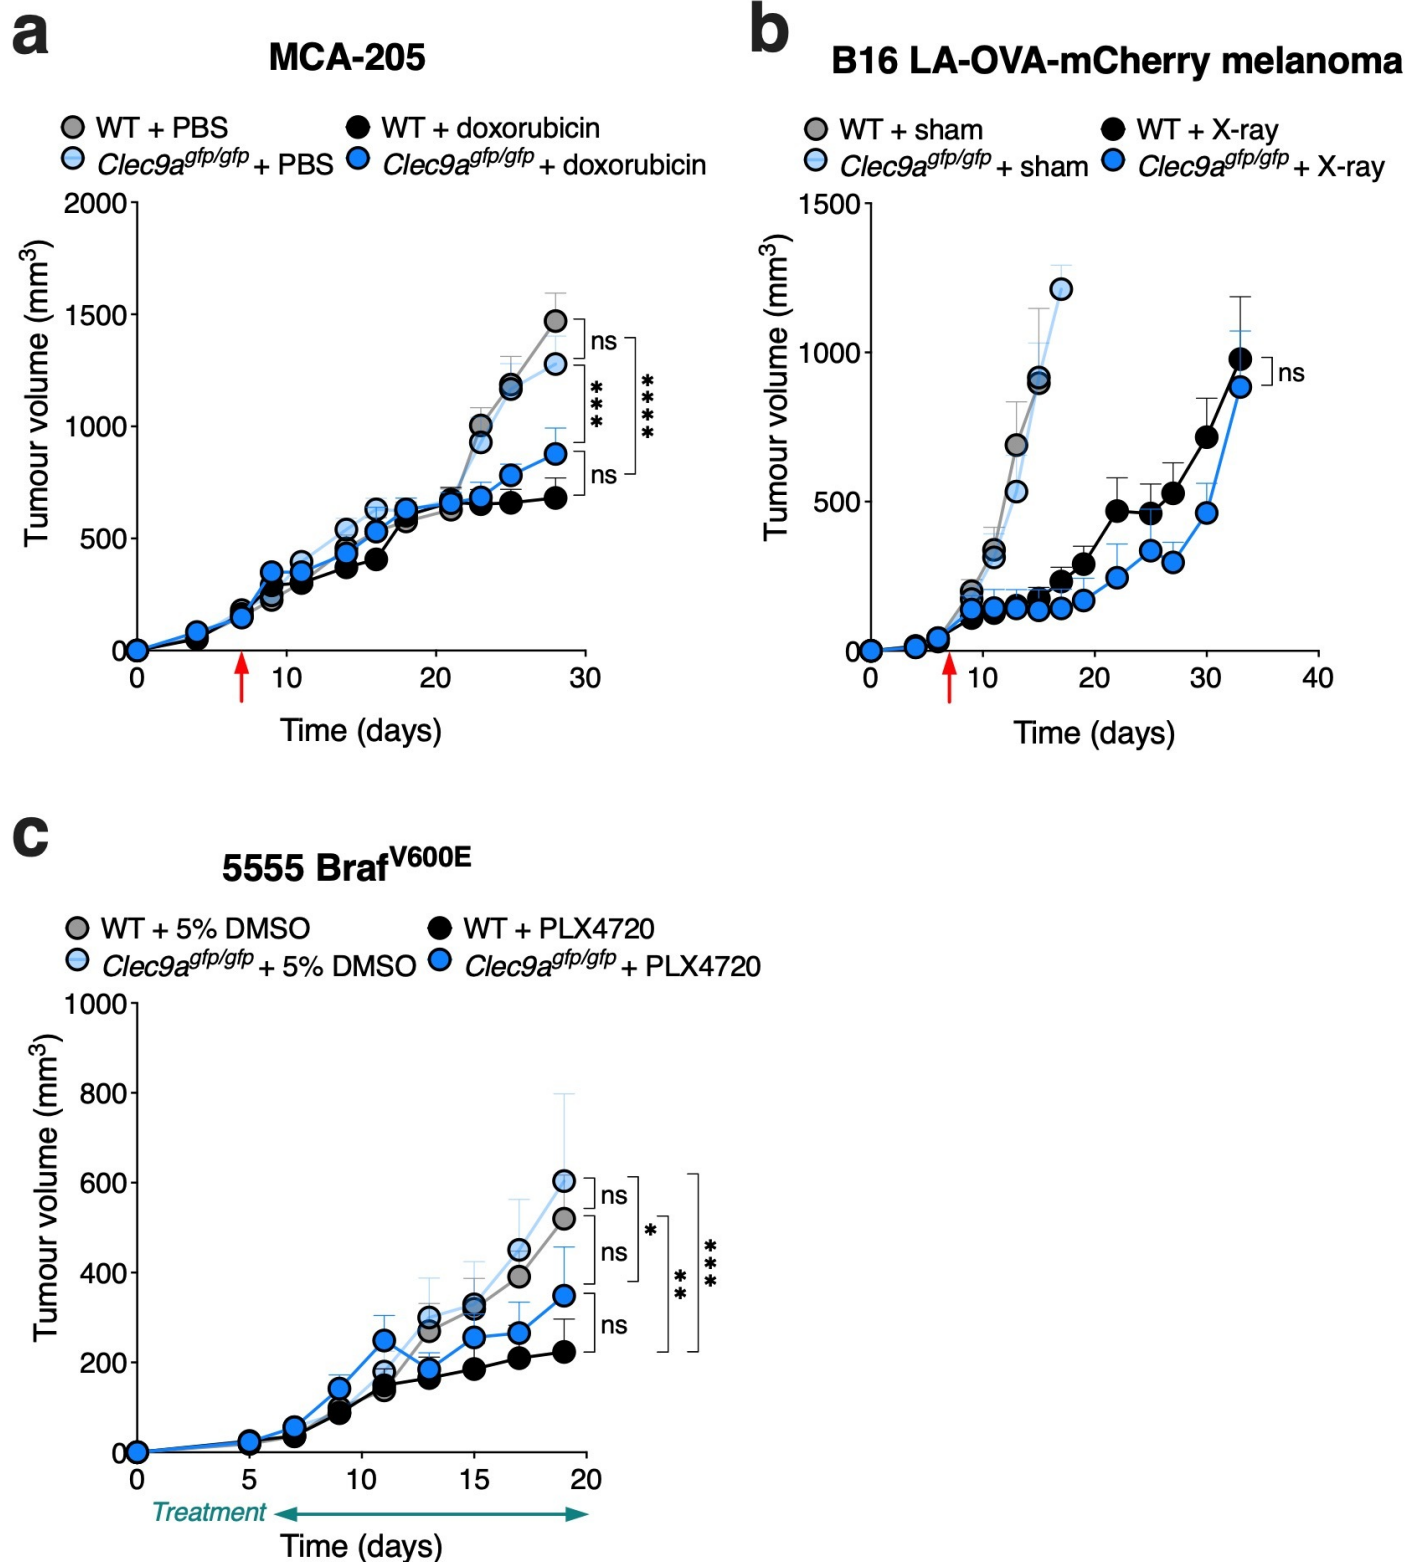

Supplement: jitc-2022-005245supp001.pdf [file jitc-2022-005245supp001.pdf]
